# Supplementary material
Source: publisher figshare collection journal article supplement (https://karger.figshare.com/ndownloader/files/25194890)
Supplement: Supplementary file 1 [file 25194890]

Online Supplemental Tab. 3.1. Eingeschlossene Essstörungs-Apps und deren Ergebnisse.

| **Name der App** | **Erstautor, Jahr** | **Beschreibung der App** | **Studiendesign/**  **Erhebungszeitpunkte** | **Stichprobe**  **&**  **Intervention** | **Compliance (Abschluss der Behandlung)** | **Qualitätsbewertung (Schwächen)1** |
| --- | --- | --- | --- | --- | --- | --- |
| **Interventionsbasierte Apps – mit Therapeutenkontakt** | | | | | | |
| **Recovery Record †,** ‡ | Tregarthen, 2015 | Rational: KVT, DBT, achtsamkeitsbasierte Elemente  Patienten- und Therapeuten-Version verfügbar.  Patienten-App: Self-Monitoring von Gefühlen, Mahlzeiten und pathologischem Essverhalten.  Therapeuten-App: Chat-Funktion mit Patienten | **Durchführbarkeit, Akzeptanz, Useranalyse**  Erhebungszeitraum:2 Jahre | N= 108996 User der App (undifferenzierte Diagnosen)  Alter (Range): 13 – 77 Jahre | - | (1), (2), (3), (5), (6), NA: (7), (8), (10) |
|  | Lindgreen, 2018a |  | **Durchführbarkeit, Akzeptanz (Kliniker)**  Erhebungszeitpunkte:1 (nach Nutzung der App**)** | N=32 Kliniker | - | (1), (2), (3), (4), (5), (6), NA: (7), (8), (9), (10) |
|  | Lindgreen, 2018b |  | **Durchführbarkeit, Akzeptanz (Patienten)**  Erhebungszeitpunkte:1 (nach Nutzung der App**)** | N=41 Patienten | - | (1), (2), (3), (4), (5), (6), NA: (7), (8), (9), (10) |
|  | Sadeh-Sharvit, 2018 |  | **Subgruppenanalyse**  Erhebungszeitraum: 1 Monat | N = 1280 User der App (undifferenzierte Diagnosen, aber in regelmäßiger therapeutischer Behandlung)  Alter (M, SD): 27,1 (11) Jahre | - | (1), (2), (3), (5), (6), NA: (7), (8), (10) |
|  | Neumayr, 2019 |  | **Durchführbarkeit, Akzeptanz, Pilot RCT**  Erhebungszeitpunkte: 3 (Beginn der Intervention; Ende der Intervention/ nach 8 Wochen; 4-Monats-Follow-up) | N=40 AN (ICD-10)  IG: N=20 (Standardintervention + App);  KG: N=20 (Standardintervention)  Alter (M, SD): IG=20,75 (6,4) Jahre; KG= 18,00 (3,73) | 15 % | (9) |
| **Noom Monitor** | Hildebrandt, 2017 | Rational: KVT  Self-Monitoring von Aktivitäten | **RCT, Akzeptanz**  Erhebungszeitpunkte: 3 (Baseline, nach 12 Wochen/ Ende der Intervention; nach 6 Monaten/ Follow-up) | N=66 BED oder BN (DSM-IV)  IG (App plus geführte Selbsthilfe):  N=33  KG (geführte Selbsthilfe):  N=33  Alter (M, SD): 32,11 (10,82) Jahre | 18,18% | (3) |
| **Interventionsbasierte Apps – ohne Therapeutenkontakt** | | | | | | |
| **Unbekannt** | Juarascio, 2015 | Rational: KVT  Geplante Features: Self-Monitoring, Essensprotokolle, Standort-Daten, Akzelerometrie, Gewichtskurve | **Akzeptanz** | N=10 Kliniker  N=11 BED (keine Angaben bzgl. Diagnosestellung)  Alter (Range): 25-67 Jahre | 0% | (1), (2), (3), (4), (5), (6), NA: (7), (8), (9), (10) |

† auf Deutsch verfügbar;‡ in deutschen App-Stores verfügbar

1 (1) Vorliegen einer unkontrollierten Studie, (2) Keine Follow-up-Daten, (3) Ausschließliches Vorliegen von Selbstbeurteilungsinstrumenten als Ergebnismessung, (4) Keine Angaben bzgl. ergänzender, weiterer psychotherapeutischen Interventionen, (5) Keine Angaben bzgl. Psychopharmakotherapie, (6) Keine Analyse der Adhärenz der Patienten oder keine Qualitätskontrollen der Behandlung bzw. keine Angaben hierzu, (7) Keine Angaben über die Ausbildung der Therapeuten, (8) Ausschließliches Vorliegen einer Warteliste oder keine Vergleichsstichprobe, (9) Kleine Stichprobengröße (N < 50), (10) Keine Erhebung von DSM- und/ oder ICD-Kriterien.

Online Supplemental Tab. 3.2. Eingeschlossene Essstörungs-Apps und deren Effektstärken.

| **App** | **RCT** | **Erstautor, Jahr** | **Fragebogen** | **Effektstärke:**  **zwischen Gruppen post**  (Cohen’s d + 95% KI) | **Effektstärke:**  **zwischen Gruppen Katamnese**  (Cohen’s d + 95% KI) |
| --- | --- | --- | --- | --- | --- |
| Recovery Record | x | Neumayr, 2019 | EDE-Q | IG + KG = -0,49; KI [-1,16; 0,19] | IG + KG = 0,20; KI [-0,48; 0,87] |
| Noom Monitor | x | Hildebrandt, 2017 | EDE-Q (Bulimische und kompensatorische Episoden) | KG + IG = 0,41; KI [-0,13; 0,95] | - |

KVT = Kognitive Verhaltenstherapie; DBT = Dialektisch-Behaviorale Therapie; AN = Anorexia Nervosa; IG = Interventionsgruppe; KG = Kontrollgruppe; EDE-Q = Eating Disorder Examination-Questionnaire [Hilbert und Tuschen-Caffier, 2006]; M = Mittelwert; SD = Standardabweichung; BED = Binge Eating Disorder; BN = Bulimia Nervosa; RCT = Randomisiert-kontrollierte Studie; KI = Konfidenzintervall.

**Literatur**

1. Hilbert A, Tuschen-Caffier B. Eating Disorder Examination Questionnaire: Deutschsprachige Übersetzung. Münster: Verlag für Psychotherapie; 2006.

2. Hildebrandt T, Michaelides A, Mackinnon D, Greif R, DeBar L, Sysko R. Randomized controlled trial comparing smartphone assisted versus traditional guided self-help for adults with binge eating. Int J Eat Disord. 2017 Nov;50(11):1313-22.

3. Juarascio AS, Manasse SM, Goldstein SP, Forman EM, Butryn ML. Review of smartphone applications for the treatment of eating disorders. Eur Eat Disord Rev. 2015;23(1):1-11.

4. Lindgreen P, Clausen L, Lomborg K. Clinicians' perspective on an app for patient self-monitoring in eating disorder treatment. Int J Eat Disord. 2018a Apr;51(4):314-21.

5. Lindgreen P, Lomborg K, Clausen L. Patient Experiences Using a Self-Monitoring App in Eating Disorder Treatment: Qualitative Study. JMIR Mhealth Uhealth. 2018b Jun 22;6(6):e10253.

6. Neumayr C, Voderholzer U, Tregarthen J, Schlegl S. Improving aftercare with technology for anorexia nervosa after intensive inpatient treatment: A pilot randomized controlled trial with a therapist-guided smartphone app. Int J Eat Disord. 2019 Aug 20.

7. Sadeh-Sharvit S, Kim JP, Darcy AM, Neri E, Vierhile M, Robinson A, et al. Subgrouping the users of a specialized app for eating disorders. Eat Disord. 2018 Jul-Aug;26(4):361-72.

8. Tregarthen J, Lock J, Darcy AM. Development of a smartphone application for eating disorder self-monitoring. Int J Eat Disord. 2015 Nov;48(7):972-82.
